# Supplementary material for: Adenosine interaction with adenosine receptor A2a promotes gastric cancer metastasis by enhancing PI3K–AKT–mTOR signaling
Source: PubMed Central journal article supplement — Mol Biol Cell. 2019 Sep 1;30(19):2527–34. doi: 10.1091/mbc.E19-03-0136 (PMC6743355; doi:10.1091/mbc.e19-03-0136), 2019-09-01
Supplement: mbc-30-2527-s001.pdf [file mbc-30-2527-s001.pdf]

# Supplemental Materials

*Molecular Biology of the Cell*

Shi et al.

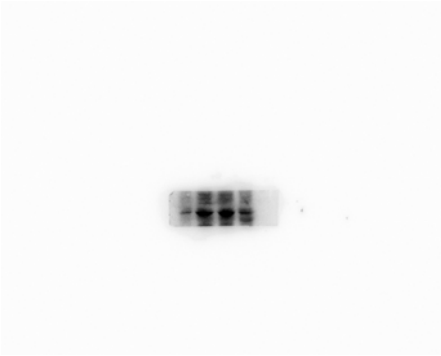

**Figure S1**

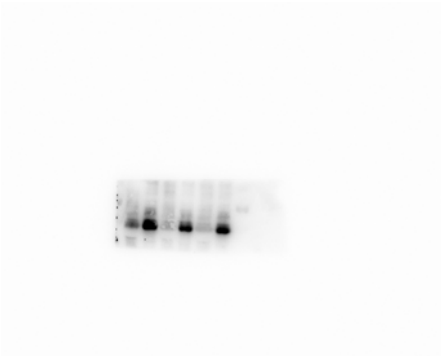

**Figure S2**

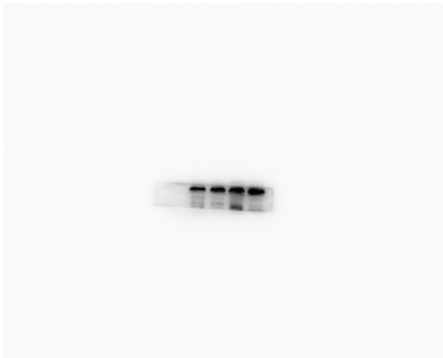

**Figure S3**

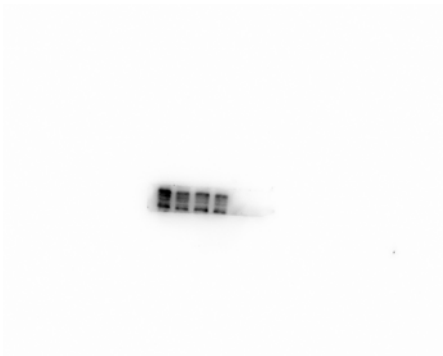

**Figure S4**

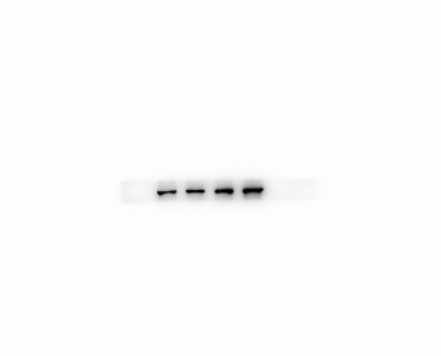

**Figure S5**

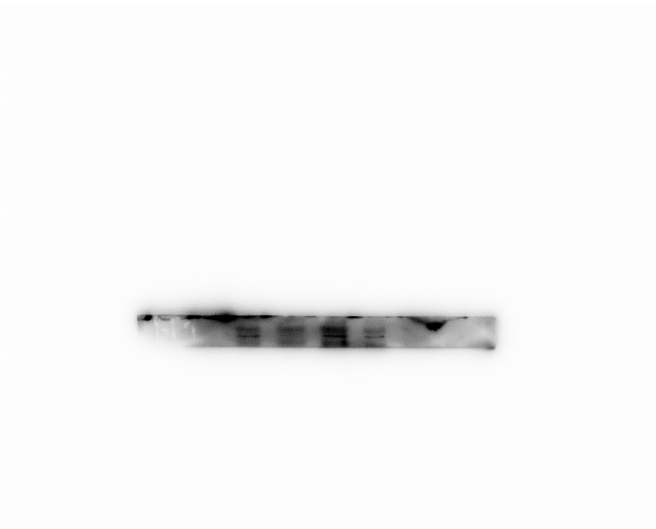

**Figure S6**

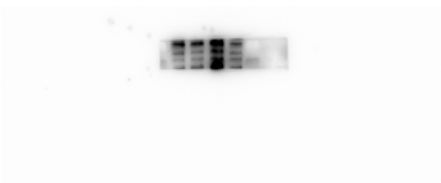

**Figure S7**

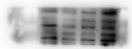

**Figure S8**

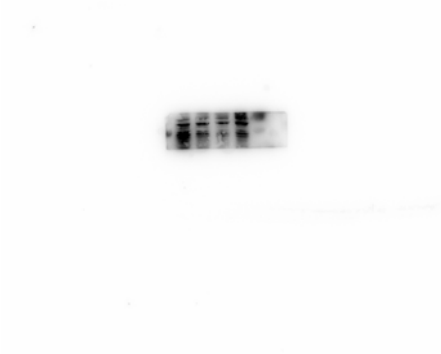

**Figure S9**

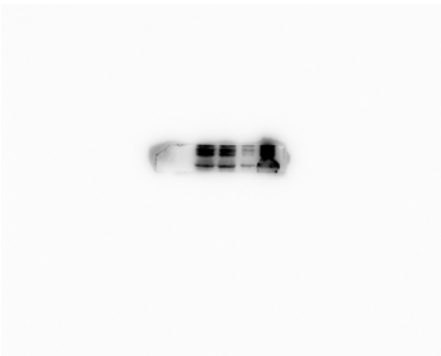

**Figure S10**

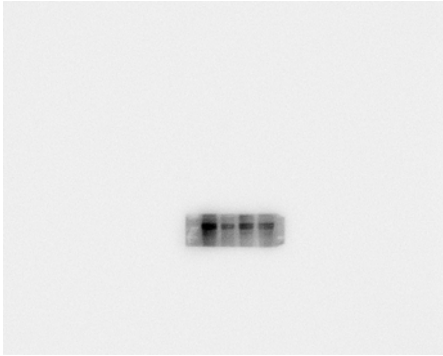

**Figure S11**

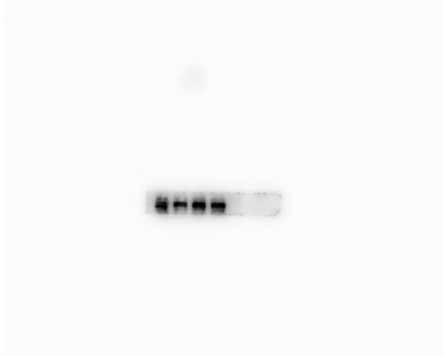

**Figure S12**

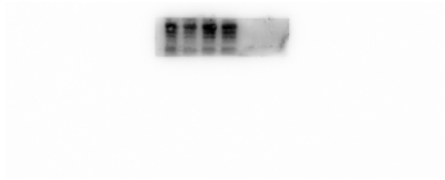

**Figure S13**

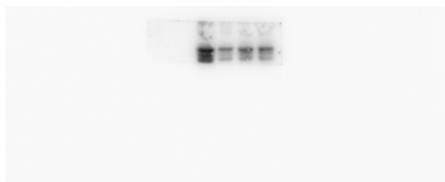

**Figure S14**



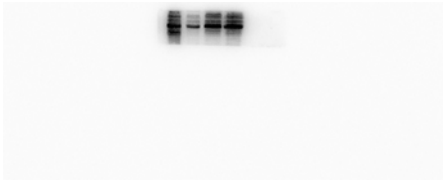

**Figure S15**

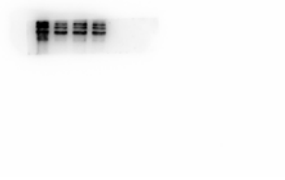

**Figure S16**

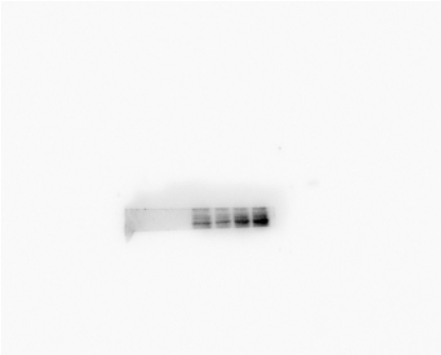

**Figure S17**

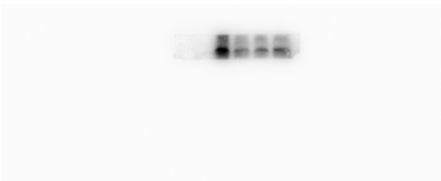

**Figure S18**

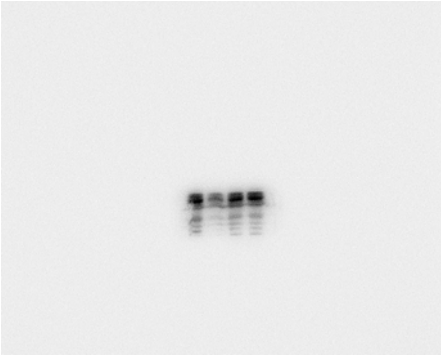

**Figure S19**

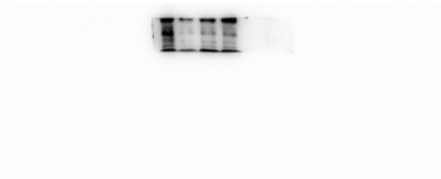

**Figure S20**

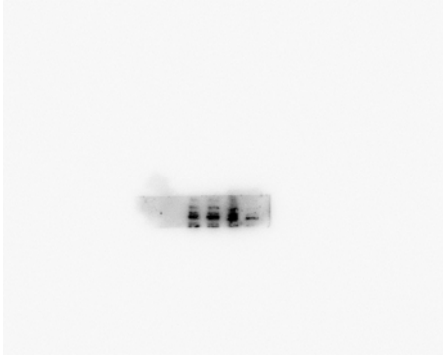

**Figure S21**

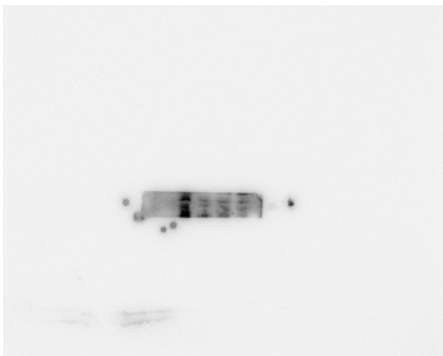

**Figure S22**

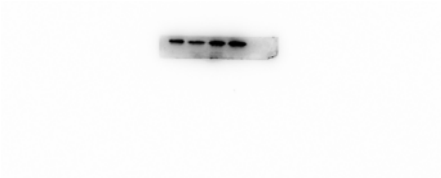

**Figure S23**

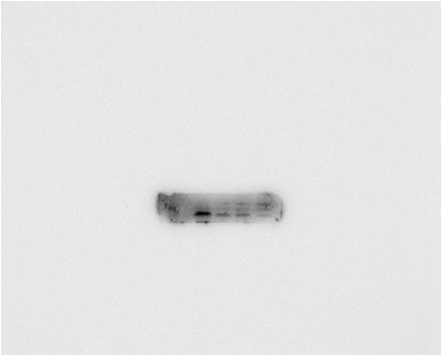

**Figure S24**

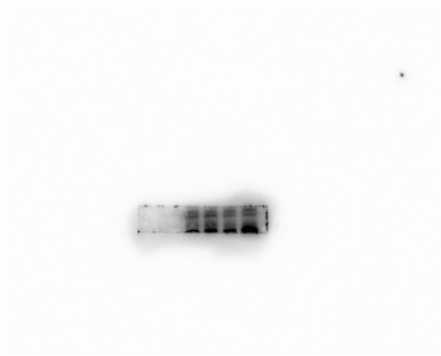

**Figure S25**

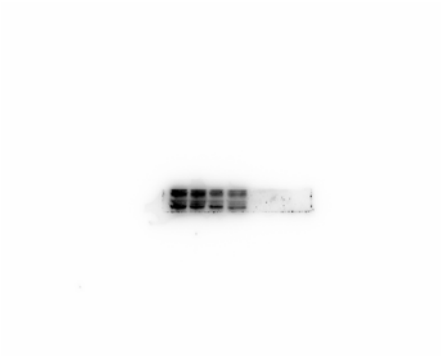

**Figure S26**

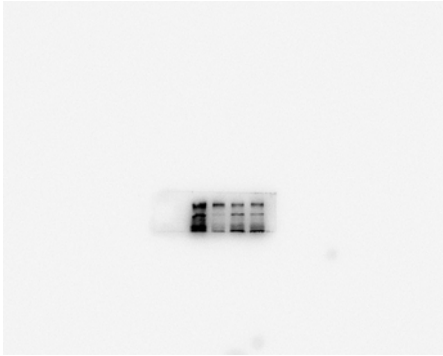

**Figure S27**

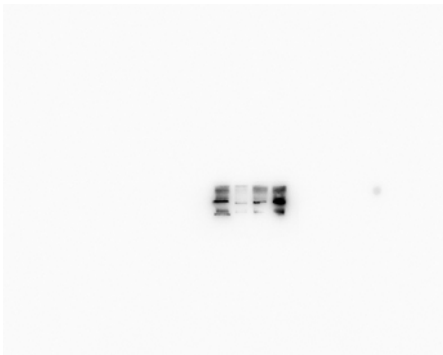

**Figure S28**

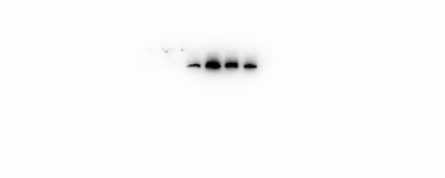

**Figure S29**

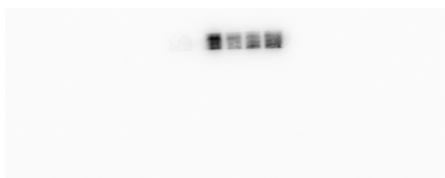

**Figure S30**



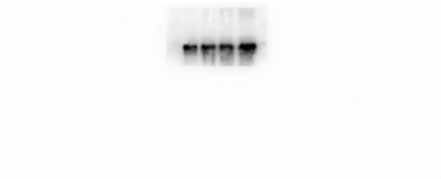

**Figure S31**

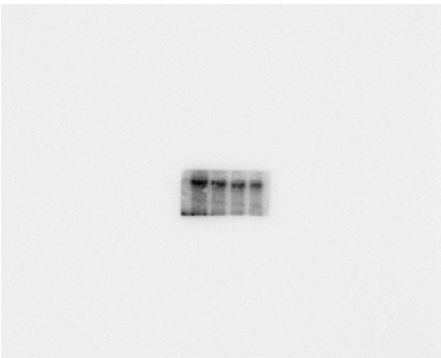

**Figure S32**

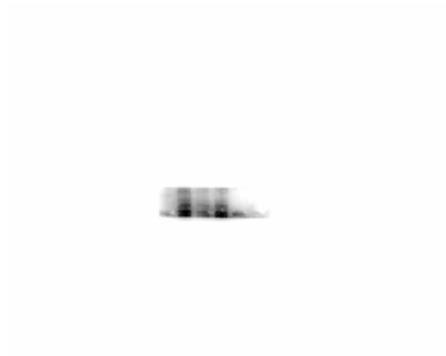

**Figure S33**

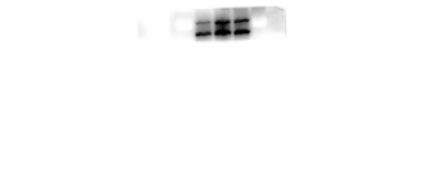

**Figure S34**

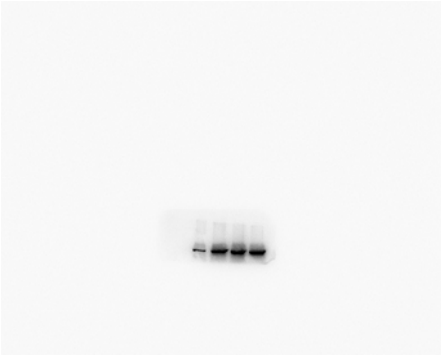

**Figure S35**

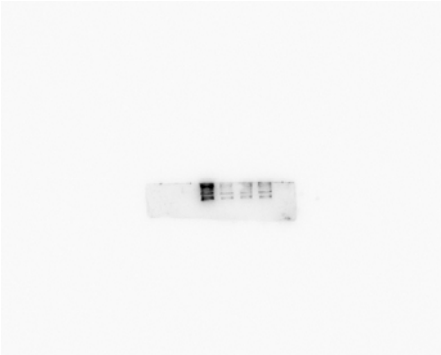

**Figure S36**

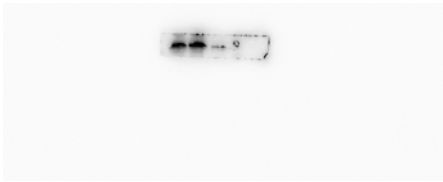

**Figure S37**

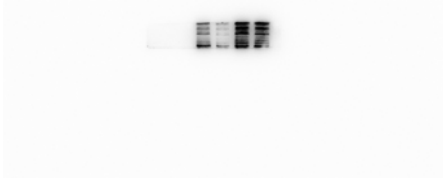

**Figure S38**

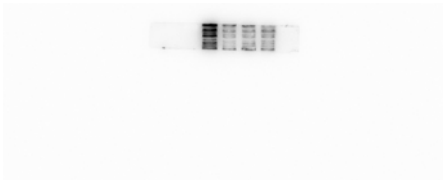

**Figure S39**

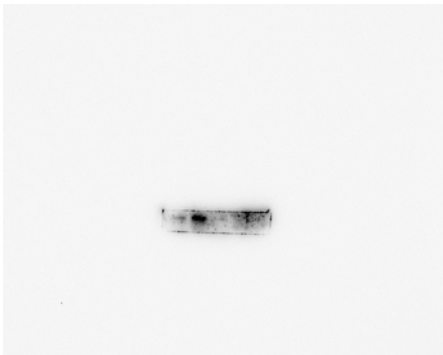

**Figure S40**

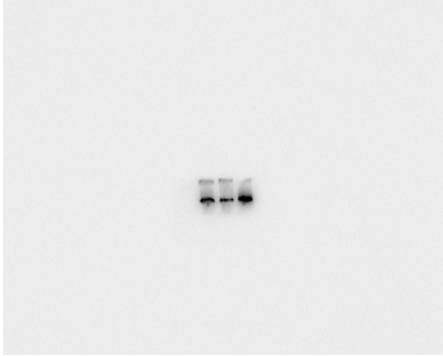

**Figure S41**

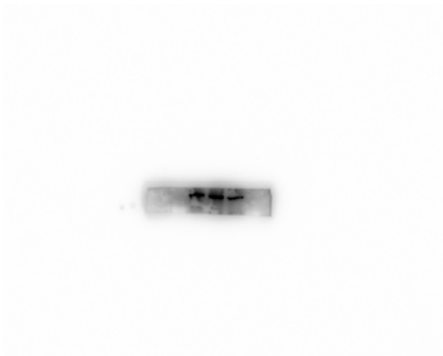

**Figure S42**
